# Supplementary material for: Wnt induces FZD5/8 endocytosis and degradation and the involvement of RSPO-ZNRF3/RNF43 and DVL
Source: eLife journal article supplement (doi:10.7554/elife.103996), 2025-01-20

Figure 2-source data

Figure 2A:  
V5

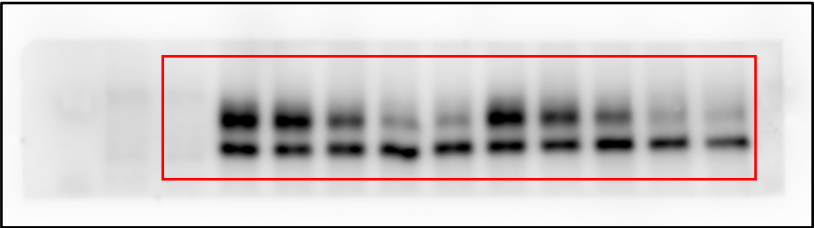

Figure 2A:  
Actin

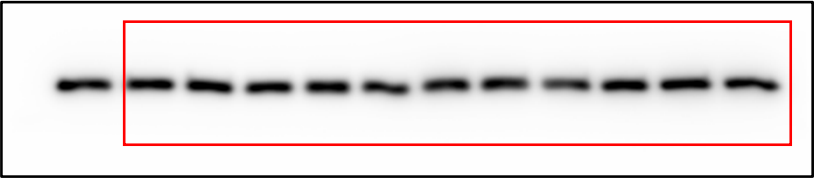

Figure 2B:  
V5

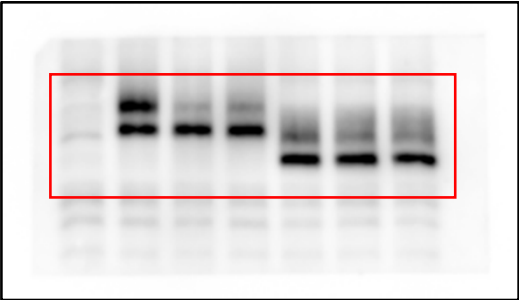

Figure 2B:  
Actin

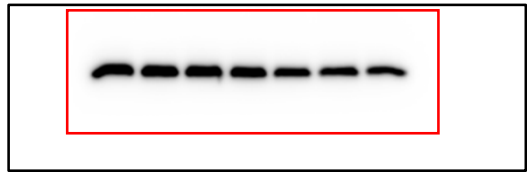

Figure 2C:  
V5

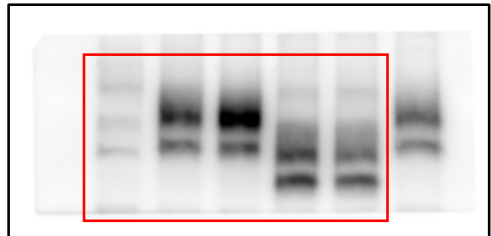

Figure 2C:  
Actin

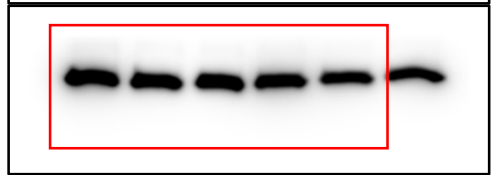

Figure 2H:  
V5

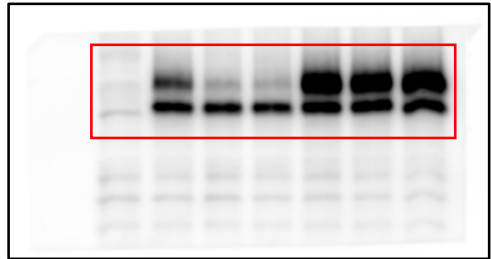

Figure 2H:  
Actin

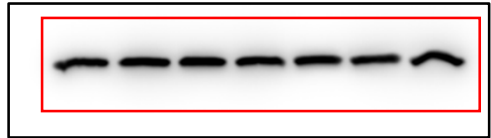

Figure 2I:  
V5

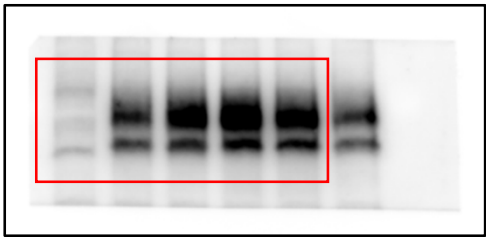

Figure 2I:  
Actin

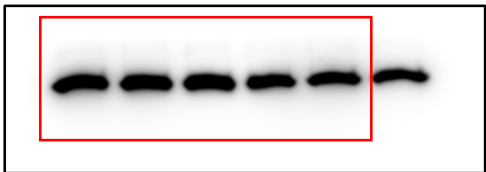

Figure 2J:  
V5

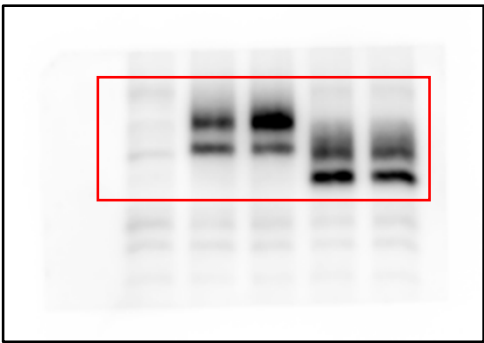

Figure 2J:  
Actin

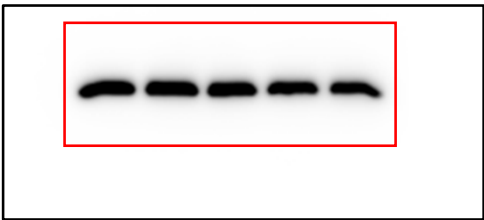

Figure 2K:  
V5

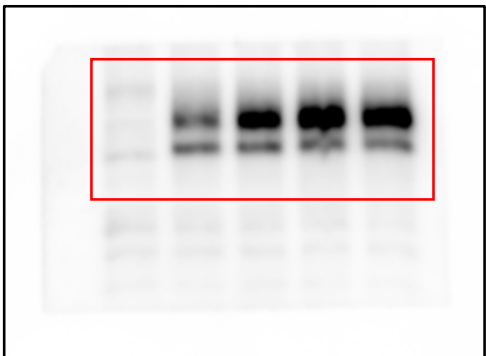

Figure 2K:  
Actin

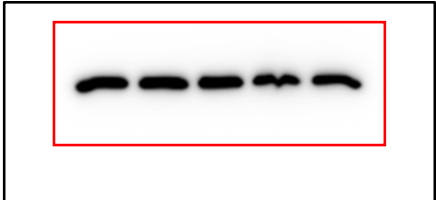

Figure 2L:  
V5

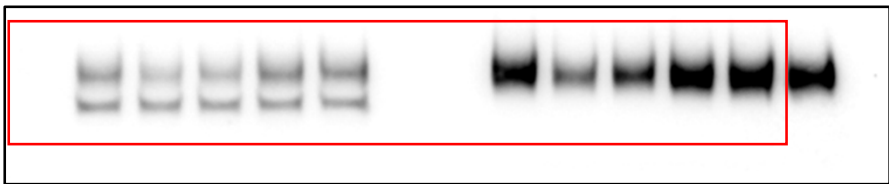

Figure 2L:  
Actin

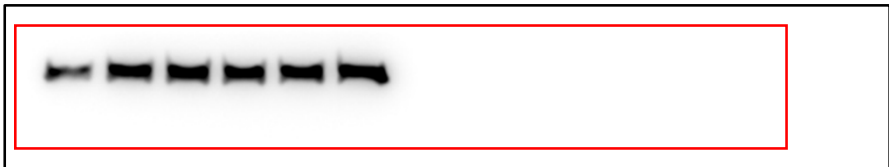

Supplement: fig2-data2 [file elife-103996-fig2-data2-v1.pdf › elife-103996-fig2-data2-v1.pdf]
