# Supplementary material for: Wnt induces FZD5/8 endocytosis and degradation and the involvement of RSPO-ZNRF3/RNF43 and DVL
Source: eLife journal article supplement (doi:10.7554/elife.103996), 2025-01-20

Figure 5-source data

Figure 5B:  
V5

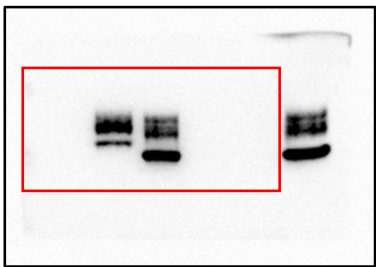

Figure 5B:  
 $\beta$ -catenin

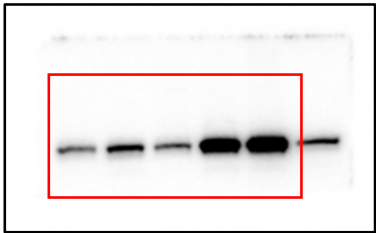

Figure 5B:  
Actin

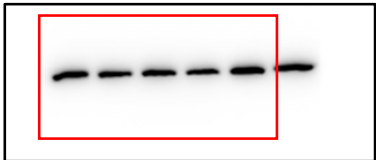

Figure 5C:  
DVL1

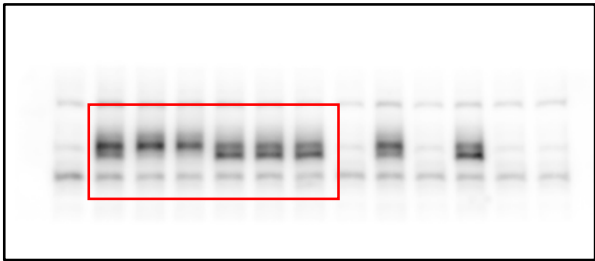

Figure 5C:  
DVL2

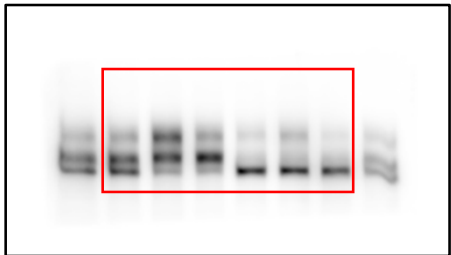

Figure 5C:  
DVL3

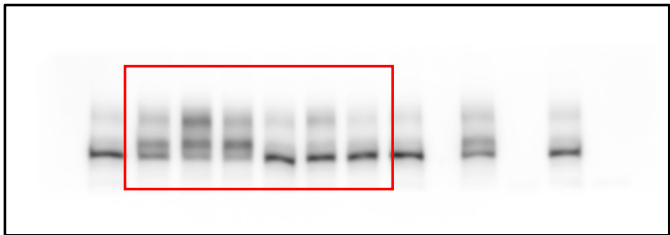

Figure 5C:  
 $\beta$ -catenin

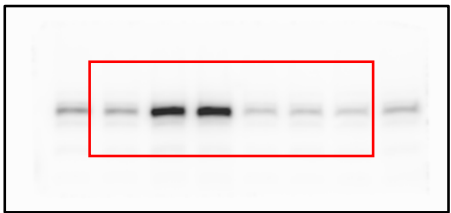

Figure 5C:  
Actin

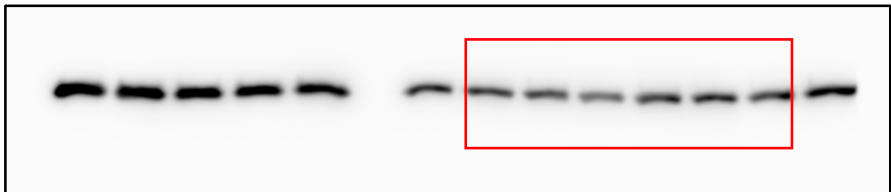

Figure 5D:  
DVL1

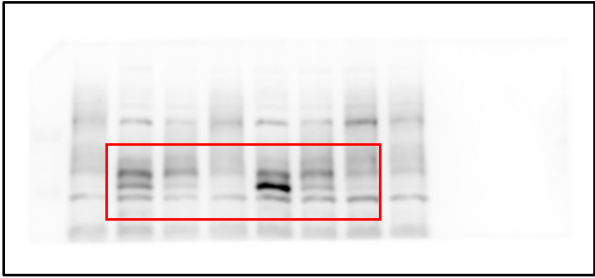

Figure 5D:  
DVL2

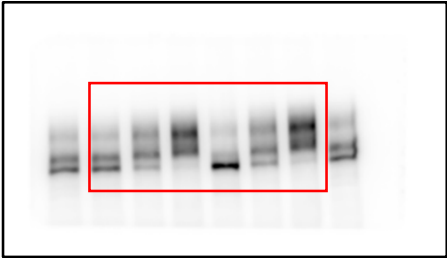

Figure 5D:  
DVL3

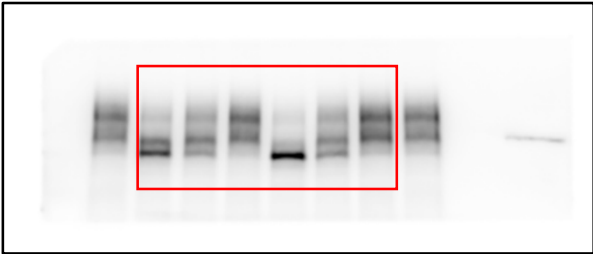

Figure 5D:  
V5

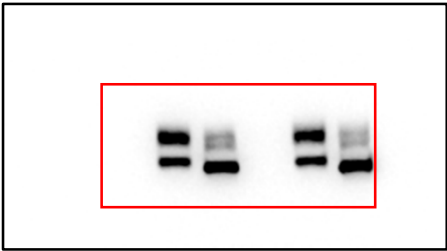

Figure 5D:  
Actin

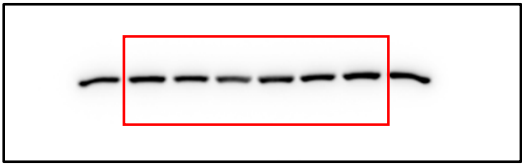

Figure 5E:  
HA

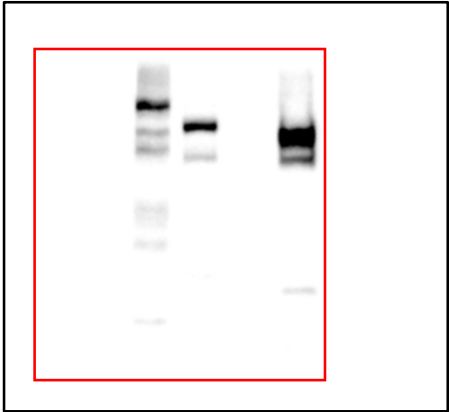

Figure 5E:  
HA  
(darker exposure)

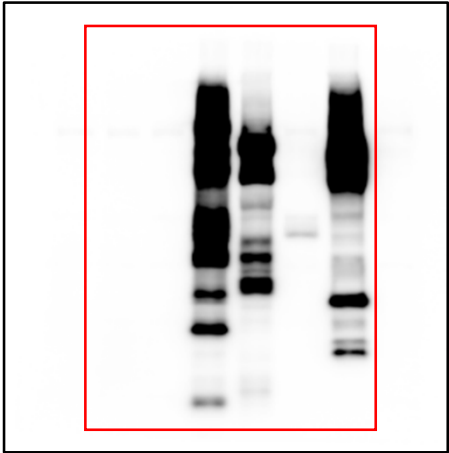

Figure 5E:  
 $\beta$ -catenin

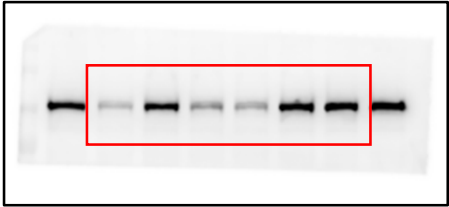

Figure 5E:  
Actin

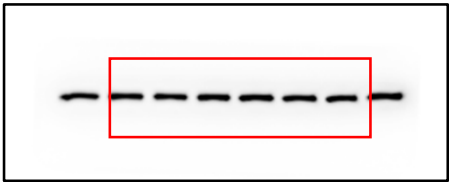

Figure 5F:  
V5

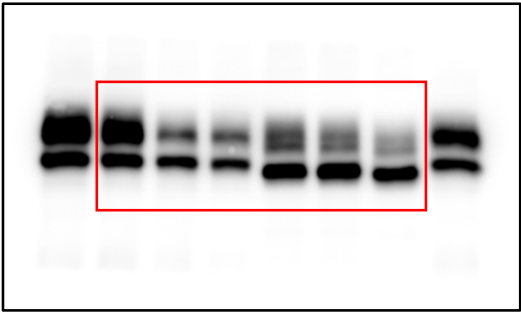

Figure 5F:  
HA

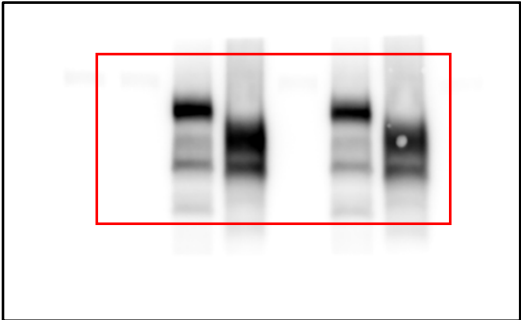

Figure 5E:  
Actin

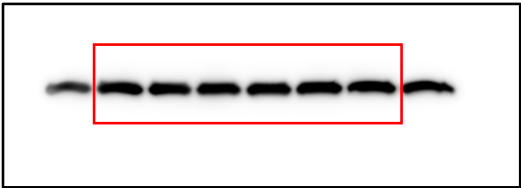

Supplement: fig5-data2 [file elife-103996-fig5-data2-v1.pdf › elife-103996-fig5-data2-v1.pdf]
