# Supplementary material for: Wnt induces FZD5/8 endocytosis and degradation and the involvement of RSPO-ZNRF3/RNF43 and DVL
Source: eLife journal article supplement (doi:10.7554/elife.103996), 2025-01-20

Figure 6-source data

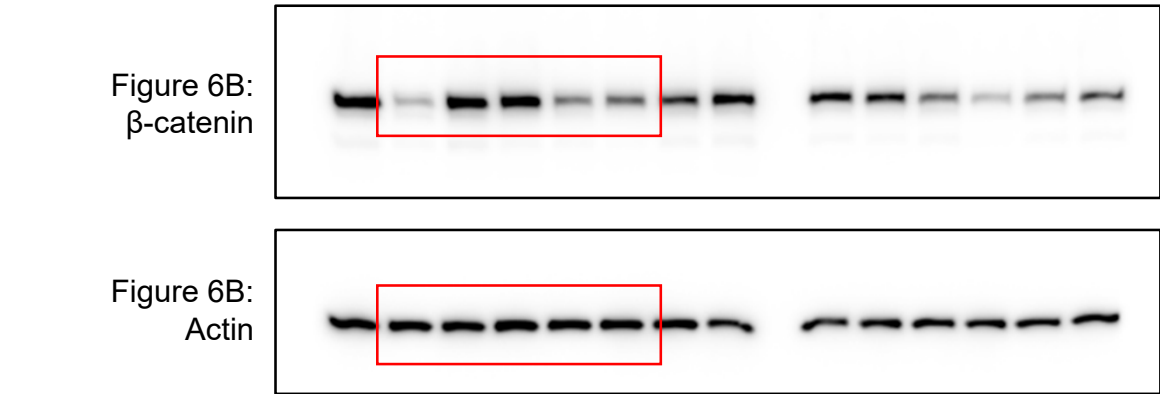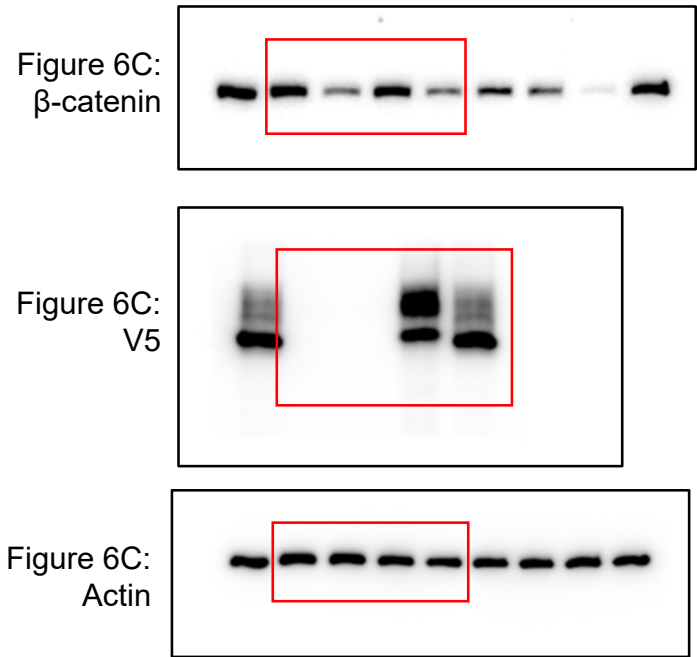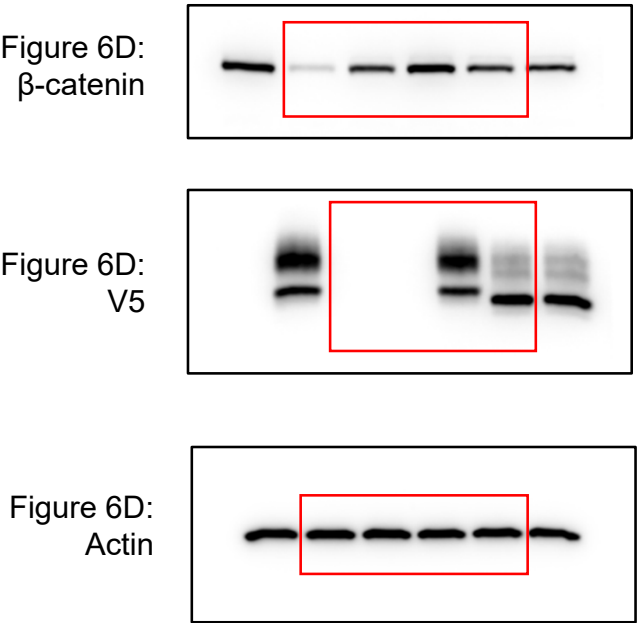

Figure 6E:  
HA

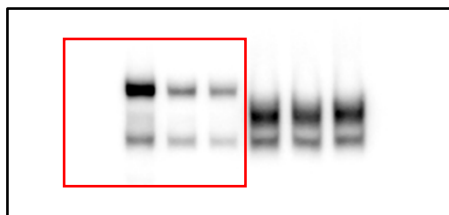

Figure 6E:  
V5

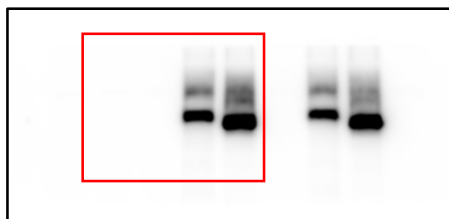

Figure 6E:  
Actin

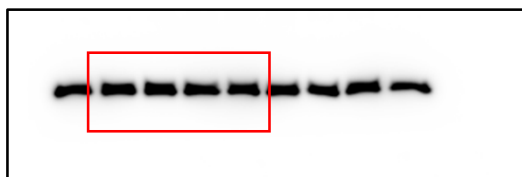

Figure 6F:  
 $\beta$ -catenin

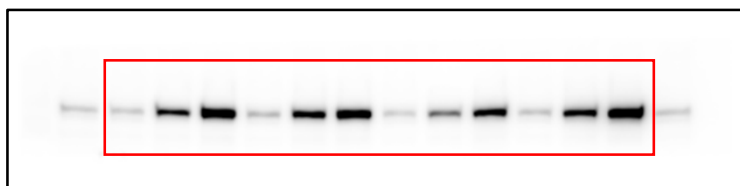

Figure 6F:  
Actin

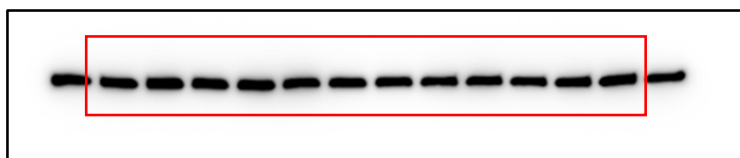

Figure 6H:  
 $\beta$ -catenin

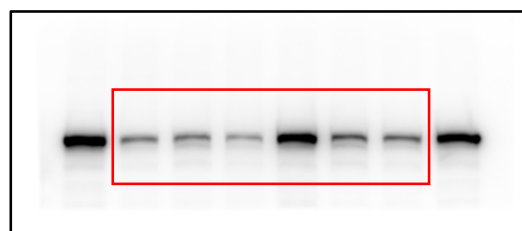

Figure 6H:  
Actin

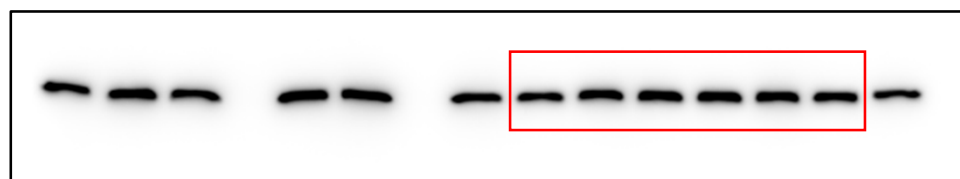

Figure 6I:  
 $\beta$ -catenin

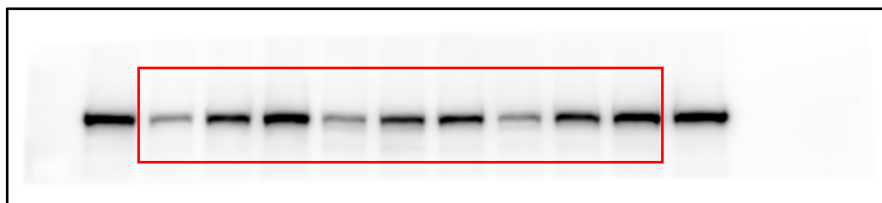

Figure 6I:  
Actin

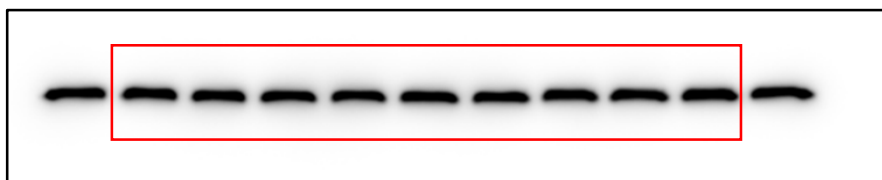

Figure 6J:  
V5

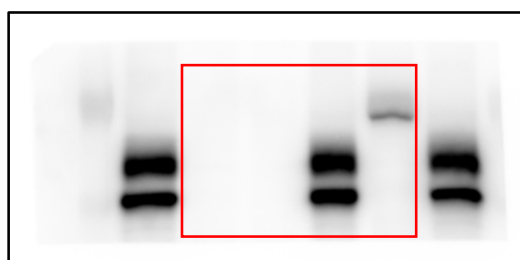

Figure 6J:  
Actin

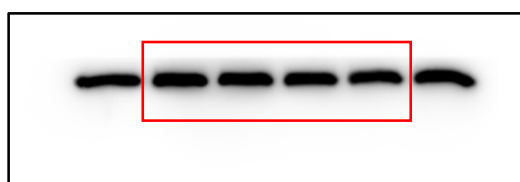

Figure 6K:  
 $\beta$ -catenin

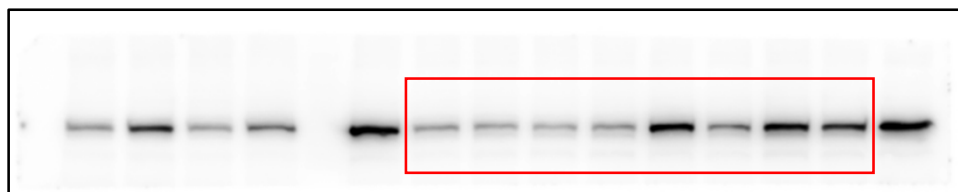

Figure 6K:  
Actin

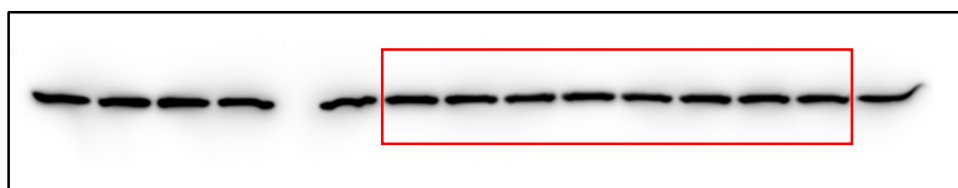

Supplement: fig6-data2 [file elife-103996-fig6-data2-v1.pdf › elife-103996-fig6-data2-v1.pdf]
