# Supplementary material for: Wnt induces FZD5/8 endocytosis and degradation and the involvement of RSPO-ZNRF3/RNF43 and DVL
Source: eLife journal article supplement (doi:10.7554/elife.103996), 2025-01-20

Figure 1-source data

Figure 1B:  
V5(FZD1-3)

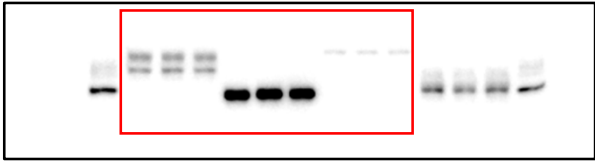

Figure 1B:  
V5(FZD4/7)

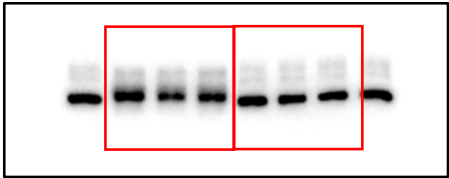

Figure 1B:  
V5(FZD5/6)

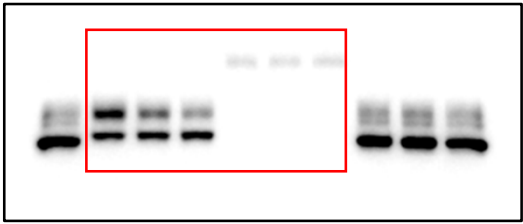

Figure 1B:  
V5(FZD8)

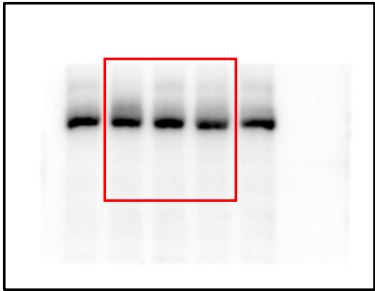

Figure 1B:  
V5(FZD9/10)

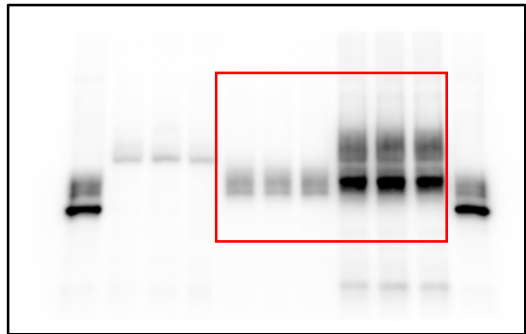

Figure 1C:  
V5

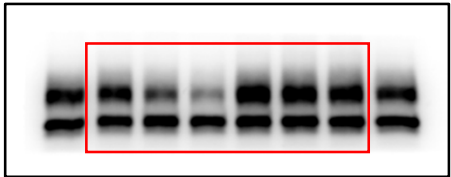

Figure 1B:  
Actin(FZD5/6)

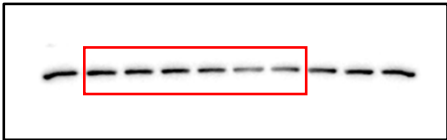

Figure 1B:  
Actin(FZD9/10)

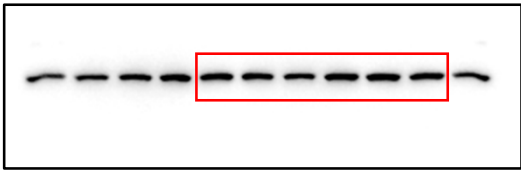

Figure 1B:  
Actin(FZD1-3)

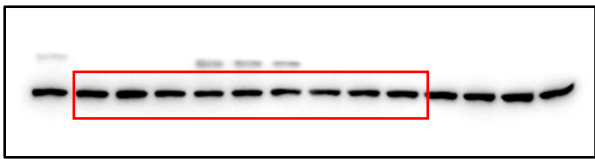

Figure 1B:  
Actin(FZD4/7/8)

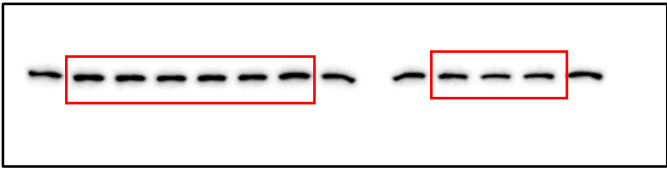

Figure 1C:  
Actin

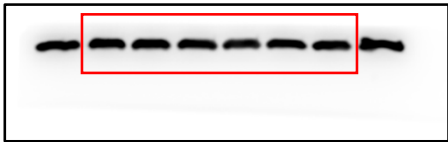

Supplement: fig1-data2 [file elife-103996-fig1-data2-v1.pdf › elife-103996-fig1-data2-v1.pdf]
