# Supplementary material for: Wnt induces FZD5/8 endocytosis and degradation and the involvement of RSPO-ZNRF3/RNF43 and DVL
Source: eLife journal article supplement (doi:10.7554/elife.103996), 2025-01-20

Figure 1-figure supplement 1-source data

Figure 1-figure supplement 1B:  
V5(FZD1/4)

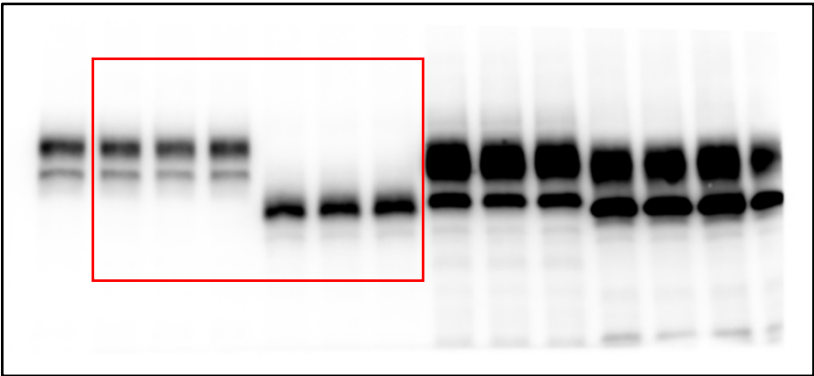

Figure 1-figure supplement 1B:  
Actin(FZD1/4)

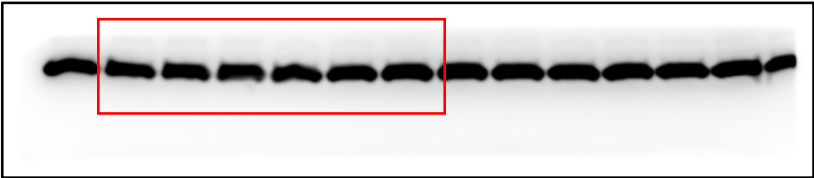

Figure 1-figure supplement 1C:  
V5(FZD5)

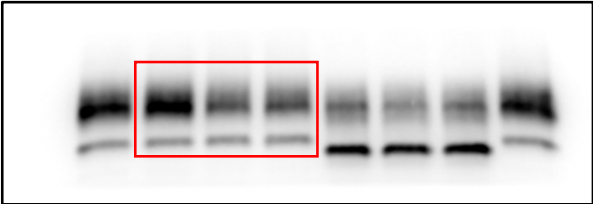

Figure 1-figure supplement 1C:  
Actin(FZD5)

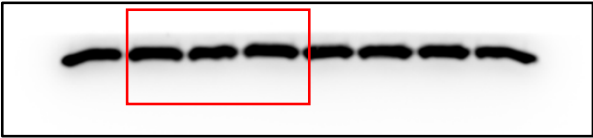

Figure 1-figure supplement 1D:  
V5(FZD7)

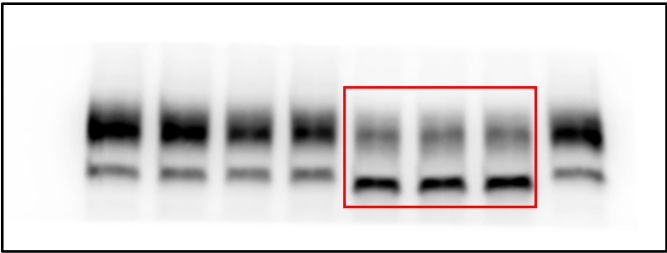

Figure 1-figure supplement 1D:  
Actin(FZD7)

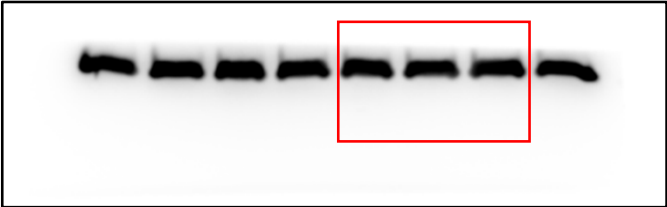

Supplement: fig1-figsupp1-data2 [file elife-103996-fig1-figsupp1-data2-v1.pdf › elife-103996-fig1-figsupp1-data2-v1.pdf]
