# Supplementary material for: Wnt induces FZD5/8 endocytosis and degradation and the involvement of RSPO-ZNRF3/RNF43 and DVL
Source: eLife journal article supplement (doi:10.7554/elife.103996), 2025-01-20

Figure 3-source data

Figure 3A:  
DVL1

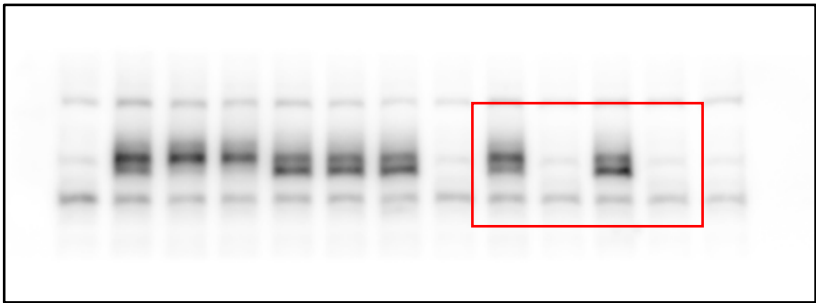

Figure 3A:  
DVL2

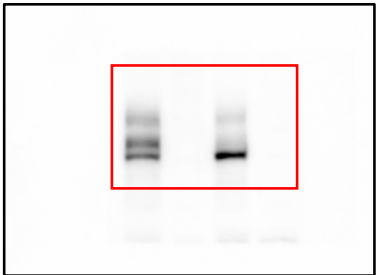

Figure 3A:  
DVL3

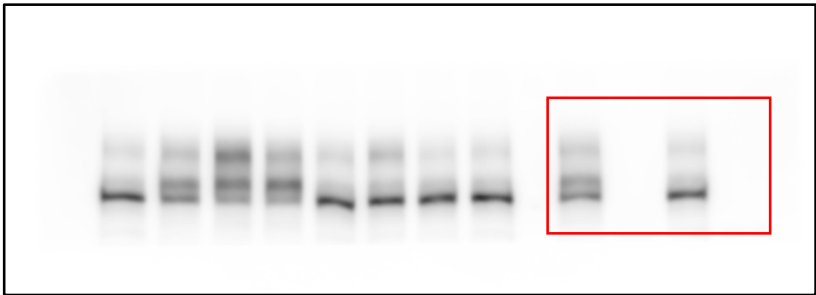

Figure 3F:  
V5

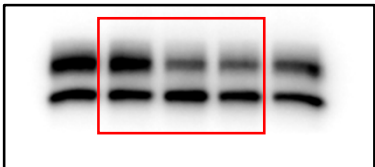

Figure 3F:  
Actin

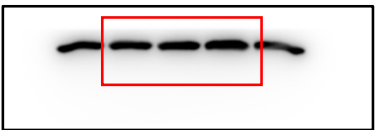

Figure 3K:  
V5

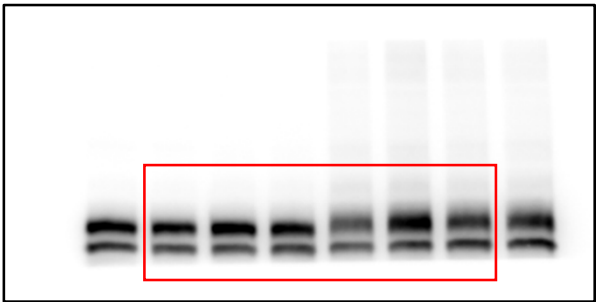

Figure 3K:  
DVL2

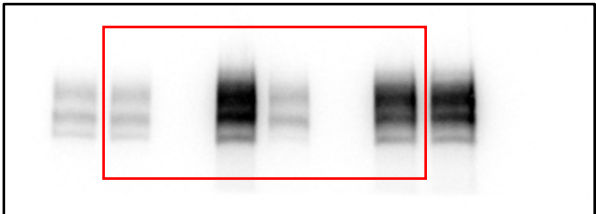

Figure 3K:  
Actin

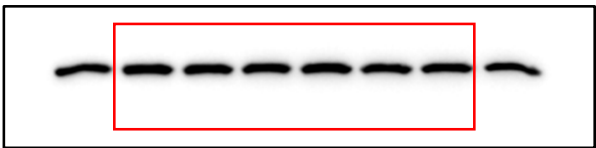

Supplement: fig3-data2 [file elife-103996-fig3-data2-v1.pdf › elife-103996-fig3-data2-v1.pdf]
