# Supplementary material for: Wnt induces FZD5/8 endocytosis and degradation and the involvement of RSPO-ZNRF3/RNF43 and DVL
Source: eLife journal article supplement (doi:10.7554/elife.103996), 2025-01-20

Figure 6-figure supplement 1-source data

Figure 6-figure supplement 1A:  
HA

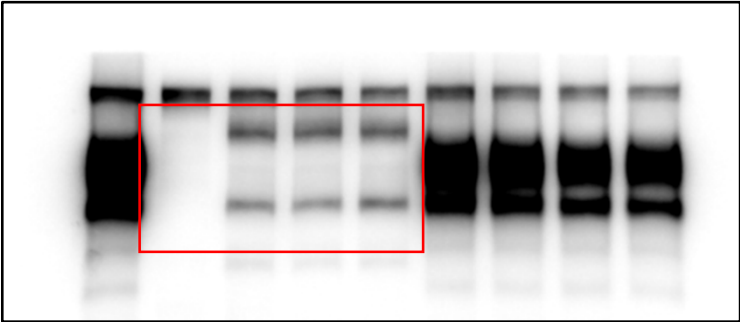

Figure 6-figure supplement 1A:  
V5

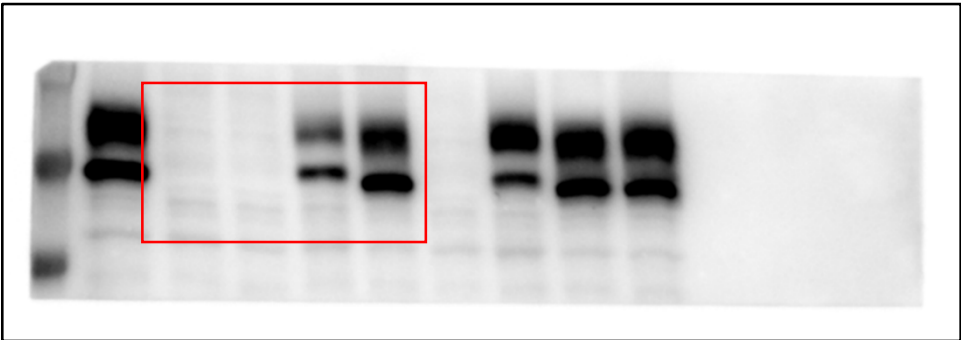

Figure 6-figure supplement 1A:  
Actin

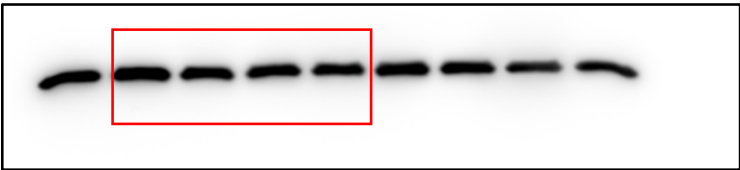

Figure 6-figure supplement 1B:  
 $\beta$ -catenin

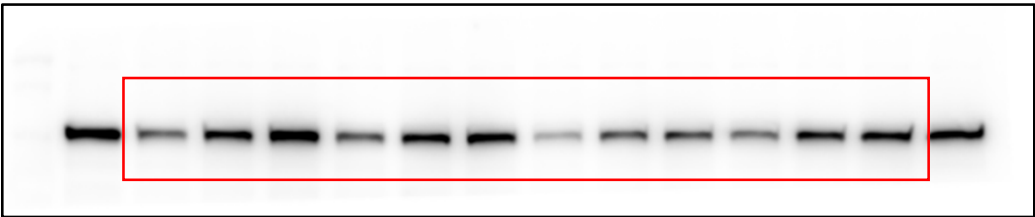

Figure 6-figure supplement 1B:  
Actin

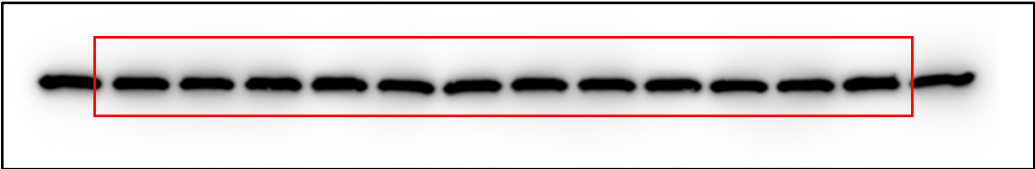

Supplement: fig6-figsupp1-data2 [file elife-103996-fig6-figsupp1-data2-v1.pdf › elife-103996-fig6-figsupp1-data2-v1.pdf]
