# Supplementary figures and images for: Wnt induces FZD5/8 endocytosis and degradation and the involvement of RSPO-ZNRF3/RNF43 and DVL
Source: eLife journal article supplement (doi:10.7554/elife.103996), 2025-01-20

## Figure 4-source data

Figure 4B:  
V5

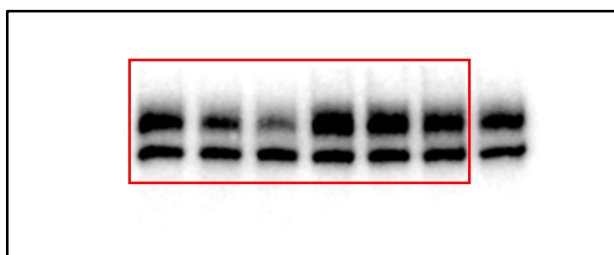

Figure 4B:  
Actin

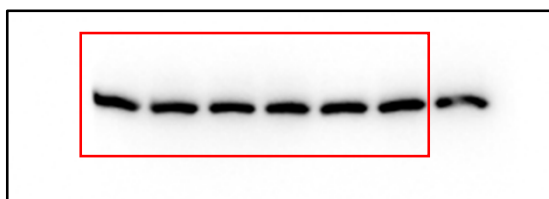

Supplement: fig4-data2 [file elife-103996-fig4-data2-v1.pdf › elife-103996-fig4-data2-v1.pdf]
